# Supplementary material for: Munc18-1 catalyzes neuronal SNARE assembly by templating SNARE association
Source: eLife. 2018 Dec 12;7:e41771. doi: 10.7554/eLife.41771 (PMC6320071; doi:10.7554/eLife.41771)
Supplement: Figure 4—source data 1. [file elife-41771-fig4-data1.xlsx]

## Sheet: Table_in_paper
	SNARE or SM	Mutation or truncation	Unfolding energy (kBT)	sem of energy (kT)	Equilibrium forcea (pN)	Folding rate (s-1)	Unfolding rate (s-1)	Partiallyclosed syntaxinb	Template formationc		SNAP-25 bindingd		Relative rate	error of relative rate
								Prob.	Prob.	N	Prob.	N
	WT	-	5.2	0.1	5.1 (0.1)	132	0.7	0.4	0.5	346	0.7	50	1	0.141421
	Munc18-1	L247R	1.6	0.3	2.3 (0.1)	-	-	0.3	0.3	99	0.7	6	0.0273237	0.00864052
		T248G	2.9	0.2	3.1 (0.1)	-	-	0	0.3	155	0.3	16	0.0429681	0.00960795
		L247A/T248G	1.5	0	-	-	-	0	0	241	0	-	0	0
		S306Dh	5.8	0.1	5.6 (0.1)	184	0.6	0.4	0.9	123	0.9	53	2.34272	0.331311
		L307R	4.1	0.2	4.6 (0.1)			0.07	0.43	114	0.58	19	0.275807	0.0616724
		S313Dh	6.1	0.2	5.7 (0.1)	568	1.5	0.4	1	162	0.8	70	2.81097	0.628553
		Δ324-339e,f	1.5	0		-	-	0	0	105	0	0	0	0
		D326Kh	6.5	0.2	5.7 (0.1)	420	0.6	0.03	0.9	103	1	27	5.24185	1.17211
		P335Ah	6	0.3	5.9 (0.1)	258	0.5	0.02	0.7	155	0.9	11	2.86141	0.904857
		P335Lg	4.3	0.1	4.8 (0.1)	17	0.2	0.4	0.3	224	0.8	36	0.464651	0.0657116
		L341Pg	1.5	0		-	-	0.06	0.04	176	0.5	4	0.0176597	0.00176597
		L348Re,f	1.5	0		-	-	0.02	0.04	222	0.7	6	0.0247235	0.00247235
		Y473Df	4	0.1	4.3 (0.2)	-	-	0	0.1	395	0.5	24	0.215139	0.0304252
	VAMP2	L32G/Q33G	3.4	0.2	3.9 (0.1)	310	10	0.4	0.6	170	0.06	33	0.0141685	0.00316817
		V39D	3.8	0.4	3.9 (0.2)	90	2	0.3	0.1	175	0.8	13	0.281825	0.116199
		M46A	5.2	0.4	5.1 (0.2)	130	0.7	0.3	0.5	52	0.8	13	1.14286	0.471212
		E62Te	4.1	0.2	4.8 (0.2)	107	5	0.4	0.5	104	0.4	23	0.190212	0.0425327
		S61D/E62Te	3.6	0.2	4.1 (0.1)			0.4	0.7	56	0.2	12	0.0576847	0.0128987
		Q76Ae	4.7	0.2	4.8 (0.1)	166	2	0.4	0.6	62	0.3	12	0.259942	0.0581247
		F77Af	1.5	0.3	2.3	-	-	0.5	0.1	121	0.5	6	0.0176597	0.00558448
		A81G/A82G	5	0.3	4.9 (0.2)	130	0.8	0.4	0.5	149	0.4	42	0.467846	0.147946
		Δ85-94	5.1	0.2	5.0 (0.1)	120	0.7	0.4	0.5	87	0.7	29	0.904837	0.202328
	Syntaxin-1	ΔNRDe,f	1.5	0	-	-	-	0	0.08	105	0.2	12	0.00706386	0.000706386
		ΔN-peptidee,f	3.2	0.2	4.6 (0.1)	42	2	0.03	0.5	328	0.4	46	0.0773344	0.0172925
		ΔHabcf	1.5	0	-	-	-	0	0.06	140	0.5	4	0.0176597	0.00176597
		L165A/E166A (LE)	6.7	0.2	6.1 (0.1)	406	0.5	0.07	0.7	83	0.9	26	5.76217	1.28846
													0	0
		LE/E76K	6.4	0.2	6.0 (0.2)	123	0.2	0.07	0.9	81	0.7	30	3.32012	0.742401
		I202G/I203G	3	0.3	3.8 (0.1)	240	12	0.4	0.5	177	0.4	33	0.0633161	0.0200223
		F216A	3.7	0.1	5.1 (0.1)	82	2	0	0.6	155	0.9	32	0.286882	0.0405712
		I230G/D231/R232Gj	3.6	0.2	4.3 (0.1)	-	-	0	0.5	111	0.4	7	0.115369	0.0257974
		I233G/E234G/Y235Gj	3	0.2	4.1 (0.1)	-	-	0	0.6	122	0.7	30	0.110803	0.0247763
		V237G/E238G/H239G	5.2	0.2	4.9 (0.1)	124	0.7	0.01	0.3	182	0.4	14	0.571429	0.127775
		T251G/K252G	5.2	0.1	4.9 (0.1)	126	0.7	0.5	0.8	197	0.7	47	1	0.141421
		Δ255-264	5.4	0.2	5.1 (0.1)	140	0.6	0.5	0.5	134	0.7	29	1.2214	0.273114
	Syntaxin-1	L165A/E166A	6.6	0.2	6.2 (0.1)	72	0.1	0.2	0.9	85	0.2	11	1.15863	0.259077
