# Supplementary material for: Munc18-1 catalyzes neuronal SNARE assembly by templating SNARE association
Source: eLife. 2018 Dec 12;7:e41771. doi: 10.7554/eLife.41771 (PMC6320071; doi:10.7554/eLife.41771)
Supplement: Figure 6—source data 1. — Dataset 1. This dataset contains 18 MATLAB figures corresponding to Figures 2–10, as are listed below. Each plot or curve in a MATLAB figure has its associated data embedded. The data values for all data points in a plot can be obtained using MATLAB command get(plot_handle,’xdata’) or get(plot_handle,’ydata’), where plot_handle is a unique identifier of the plot. [file elife-41771-fig6-data1.xlsx]

## Sheet: Sheet1
		Probility of SNARE assembly
Munc18-1 (uM)	SNAP-25 (nM)	Spontaneous Assembly	Misassembly	Chaperoned Assembly
0	60	0.08 (0.03)	0.1 (0.04)	N/A
	200	0.41 (0.06)	0.1 (0.04)	N/A
2	60	0	0	0.53 (0.07)
	200	0.04 (0.02)	0	0.68 (0.06)
