# Supplementary material for: Munc18-1 catalyzes neuronal SNARE assembly by templating SNARE association
Source: eLife journal article supplement (doi:10.7554/elife.41771), 2018-12-12
Supplement: supp [file elife_poa_e41771_Figure_2_figure_supplement_1.pdf › elife_poa_e41771_Figure_2_figure_supplement_1.pdf]

### Figure 2-figure supplement 1

## Neuronal SNAREs

| Domain        | NRD                                                   |  |  |  |  |  |  |  |  |  | NTD                                                                     |  |  |  |  |  |  | CTD   |  |  |  |  |  |  |  |  |  |     |
|---------------|-------------------------------------------------------|--|--|--|--|--|--|--|--|--|-------------------------------------------------------------------------|--|--|--|--|--|--|-------|--|--|--|--|--|--|--|--|--|-----|
| Layer #       |                                                       |  |  |  |  |  |  |  |  |  |                                                                         |  |  |  |  |  |  |       |  |  |  |  |  |  |  |  |  |     |
| VAMP2 #       | -8 -7 -6 -5 -4 -3 -2 -1 0 1 2 3 4 5 6 7 8             |  |  |  |  |  |  |  |  |  |                                                                         |  |  |  |  |  |  |       |  |  |  |  |  |  |  |  |  |     |
| VAMP2 (R)     | 25 29 32 35 39 42 46 49 53 56 60 63 67 70 74 77 81 84 |  |  |  |  |  |  |  |  |  |                                                                         |  |  |  |  |  |  |       |  |  |  |  |  |  |  |  |  | 96  |
| VAMP2 (R)     | MS...EGGPPAPPNLTSTNRR                                 |  |  |  |  |  |  |  |  |  | LQQTQAQVDEVVDIMRVNVDKVLERDQKLTSEIDDRADALQAGASQFETSAAKLKRKYWKNLKM...     |  |  |  |  |  |  | LCT   |  |  |  |  |  |  |  |  |  | F   |
| Qa            | I187C                                                 |  |  |  |  |  |  |  |  |  | R198C                                                                   |  |  |  |  |  |  | L205C |  |  |  |  |  |  |  |  |  |     |
| Syntaxin-1A   | MKDR...SISKQALSEIETRHSE                               |  |  |  |  |  |  |  |  |  | TIKLTENSTRELHDMFMDMAMLVESQGEMTDRIEYNVEHAVDYVERAVSDTKKAVKYQSKARRKK...QKI |  |  |  |  |  |  |       |  |  |  |  |  |  |  |  |  |     |
| Syntaxin-1A # | 1 187 198                                             |  |  |  |  |  |  |  |  |  |                                                                         |  |  |  |  |  |  |       |  |  |  |  |  |  |  |  |  | 265 |
| SNAP-25B #    | 1                                                     |  |  |  |  |  |  |  |  |  |                                                                         |  |  |  |  |  |  |       |  |  |  |  |  |  |  |  |  | 95  |
| SN1 (Qb)      | MA...QRRADQLADESLES                                   |  |  |  |  |  |  |  |  |  | TRRMLQLVVEESKDAGIRTLVMTDEQGEQTERIEEGMDQTNKDMKEAEKNITDLGKFSGLSVSPSNKL... |  |  |  |  |  |  |       |  |  |  |  |  |  |  |  |  |     |
| SN2 (Qc)      | AR...RVTNDARENEMDEN                                   |  |  |  |  |  |  |  |  |  | LEQVSGITGNLRHMAALDMGNETDTQNRQTDRIIMEKADSNKTRIDEANQRAATKMLGSG            |  |  |  |  |  |  |       |  |  |  |  |  |  |  |  |  |     |
| SNAP-25B #    | 118                                                   |  |  |  |  |  |  |  |  |  |                                                                         |  |  |  |  |  |  |       |  |  |  |  |  |  |  |  |  | 206 |

## Rat GLUT4 SNAREs

VAMP2 # 1 25 29 32 35 39 42 46 49 53 56 60 63 67 70 74 77 81 84 96 F  
VAMP2 (R) MS...EGGPPAPPNPNTSNRR LQQ TQAQVDEVVDI MRV NVDKVLERDQK LSELDDR ADAL QAGASQ FETS AAK LKRKYWWKNLKM... LCT

Syntaxin-4 MKDR...QVTRQALNEISARHSE IQQ TERS TRELHEI FTFLATEVEM QGEM INRIEKN LSS ADY VERG QEHV KIALENQKKARKKK... QKI  
Syntaxin-4 # 1 1 194 206 273 F

SNAP-23 # 1 90  
SN1 (Qb) MD...IQLRAHQVTDESLESTRR ILGLAIESQDAG IKT ITMTDEQGEQ LNR IEEGMDQ LNKDMREA EKT T TELNKCCGLCVCPCNRT...  
SN2 (Qc) PQ...KRITNDAREDEMEENLTQVGS I LGNLKNM ALDMGNETDA QNQQT QKITEKADTNKNRI DIANTRA KKLIDS  
SNAP-23 # 127 210

## Yeast vacuolar SNAREs

**Peast vacuolar SNAREs**

|           | 148                                                                                      | 218 | F      |
|-----------|------------------------------------------------------------------------------------------|-----|--------|
| Nyv1 (R)  | GSSCGGGVENNGGDSINSVQRETEDVRGIMSRNIEGLIERGERIDILVVDKTDRLGGSAREFRLRSRGILKRKMWWKNVK..GCK    |     | ↑      |
| Vam3 (Qa) | GSSCGGGLILEREFEETIRNIEQGVSDLNVIFFQOVAQLVAEQGEVLDTIERNVEAVGDDTTRGADRELRAAARYQKRARSRM..QKI | 252 | ↓<br>F |
| Vti1 (Qb) | 126 GSMLDRSTQRILKASQALAAETEAIGASMLAQLQQQREVITANTTRILYESEGYVDRSIIKSLKGLIARRM              | 190 |        |
| Vam7 (Qc) | 308 GSKLDEQEEYVKDITGVHVRRLRHILGTETYNATESQKDDLDTLDQGLITRLNGILDKAKALEKKVSGRA               | 371 |        |
