# Supplementary material for: Munc18-1 catalyzes neuronal SNARE assembly by templating SNARE association
Source: eLife journal article supplement (doi:10.7554/elife.41771), 2018-12-12
Supplement: supp [file Readme.docx]

The MATLAB codes here are required to perform the hidden-Markov modeling described in

Yongli Zhang, Junyi Jiao, and Aleksander A. Rebane. 2016. Hidden Markov modeling with detailed balance and its application to single protein folding. *Biophys J.* 111: 2110-2124.

The main programs are hmm_sim_grad_em_error.m and hmm_sim_grad_skew.m. The former simulates an extension-time trajectory based on a hidden-Markov model with a normal noise distribution, analyzes the trajectory using the hidden-Markov modeling with detailed balance (HMM-DB) and the HMM with the traditional expectation-maximization (HMM-EM), and compares the results obtained from both HMM methods and the model inputs. The latter simulates an extension-time trajectory based on a hidden-Markov model with a skew-normal noise distribution, analyzes the trajectory using HMM-DB, and compares the best-fit parameter values with the model input. Other programs are required by the two programs.

The following codes are directly extracted from the Hidden Markov Model toolbox, which are downloaded from <http://www.cs.ubc.ca/~murphyk/Software/HMM/hmm.html> and distributed under the [MIT License](http://www.opensource.org/licenses/mit-license.php):

em_converged.m

fwback.m

logdet.m

mc_sample.m

mhmm_em.m

mhmm_logprob.m

mk_stochastic.m

normalize.m

process_options.m

sample_discrete.m

sqdist.m

viterbi_path.m.

The following codes are modified from the above codes by Dr. Yongli Zhang (YZ):

fwdback_YZ.m

fwdback_YZ_skew.m

mhmm_sample_YZ.m

mhmm_sample_YZ_skew.m.

Copyright (c) 2016, Yongli Zhang, Junyi Jiao, and Aleksander A. Rebane

All rights reserved.

Redistribution and use in source and binary forms, with or without modification, are permitted provided that the following conditions are met:

* Redistributions of source code must retain the above copyright notice, this list of conditions

and the following disclaimer.

* Redistributions in binary form must reproduce the above copyright notice, this list of

conditions and the following disclaimer in the documentation and/or other materials provided

with the distribution

THIS SOFTWARE IS PROVIDED BY THE COPYRIGHT HOLDERS AND CONTRIBUTORS "AS IS" AND ANY EXPRESS OR IMPLIED WARRANTIES, INCLUDING, BUT NOT LIMITED TO, THE IMPLIED WARRANTIES OF MERCHANTABILITY AND FITNESS FOR A PARTICULAR PURPOSE

ARE DISCLAIMED. IN NO EVENT SHALL THE COPYRIGHT OWNER OR CONTRIBUTORS BE LIABLE FOR ANY DIRECT, INDIRECT, INCIDENTAL, SPECIAL, EXEMPLARY, OR CONSEQUENTIAL DAMAGES (INCLUDING, BUT NOT LIMITED TO, PROCUREMENT OF SUBSTITUTE GOODS OR SERVICES; LOSS OF USE, DATA, OR PROFITS; OR BUSINESS INTERRUPTION) HOWEVER CAUSED AND ON ANY THEORY OF LIABILITY, WHETHER IN CONTRACT, STRICT LIABILITY, OR TORT (INCLUDING NEGLIGENCE OR OTHERWISE) ARISING IN ANY WAY OUT OF THE USE OF THIS SOFTWARE, EVEN IF ADVISED OF THE POSSIBILITY OF SUCH DAMAGE.
