# Supplementary figures and images for: Munc18-1 catalyzes neuronal SNARE assembly by templating SNARE association
Source: eLife journal article supplement (doi:10.7554/elife.41771), 2018-12-12

Figure 10-figure supplement 1

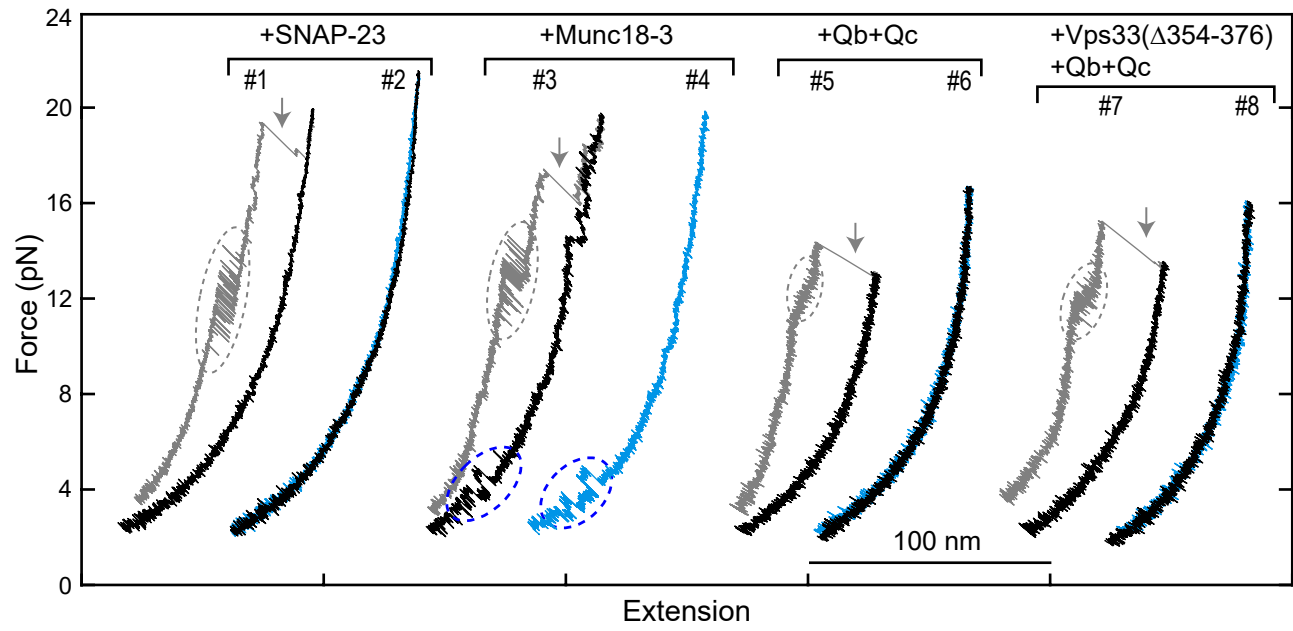

Supplement: supp [file elife_poa_e41771_Figure_10_figure_supplement_1.pdf › elife_poa_e41771_Figure_10_figure_supplement_1.pdf]

**Figure 10-figure supplement 2**

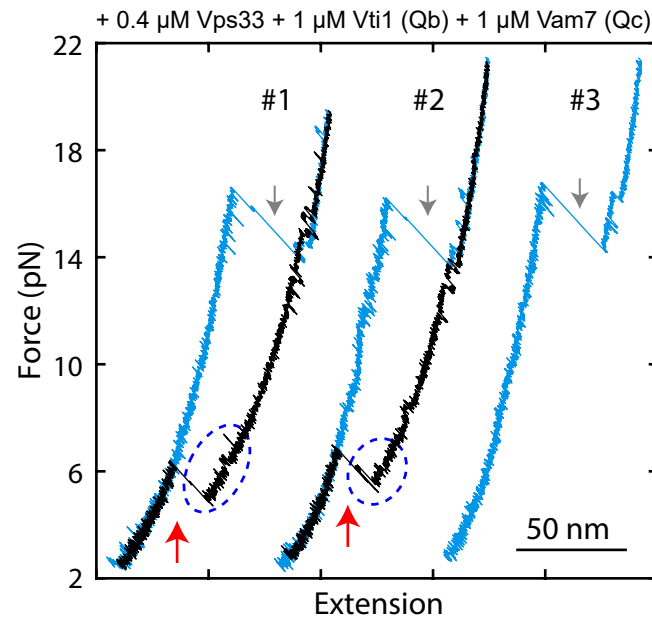

Supplement: supp [file elife_poa_e41771_Figure_10_figure_supplement_2.pdf › elife_poa_e41771_Figure_10_figure_supplement_2.pdf]

**Figure 10-figure supplement 3**

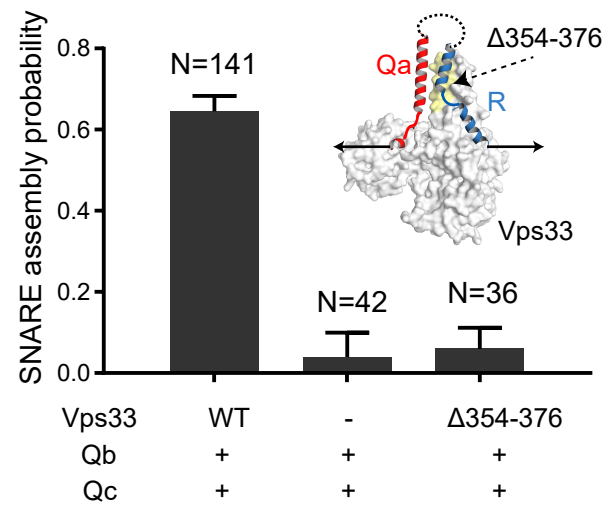

Supplement: supp [file elife_poa_e41771_Figure_10_figure_supplement_3.pdf › elife_poa_e41771_Figure_10_figure_supplement_3.pdf]

Figure 2-figure supplement 2

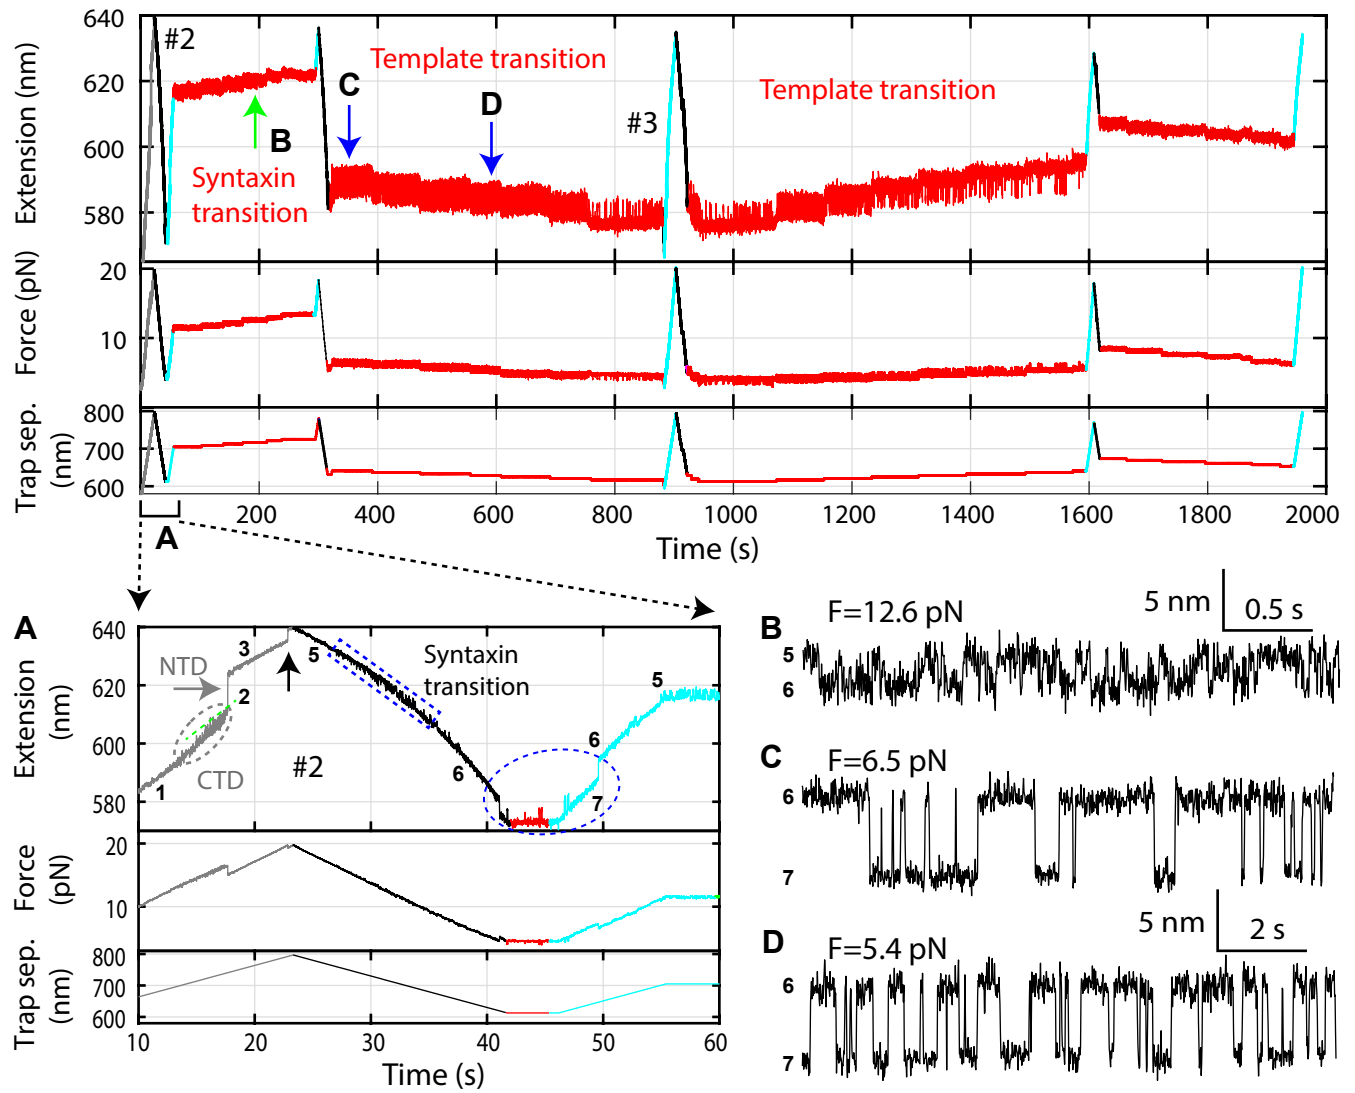

Supplement: supp [file elife_poa_e41771_Figure_2_figure_supplement_2.pdf › elife_poa_e41771_Figure_2_figure_supplement_2.pdf]

**Figure 2-figure supplement 3**

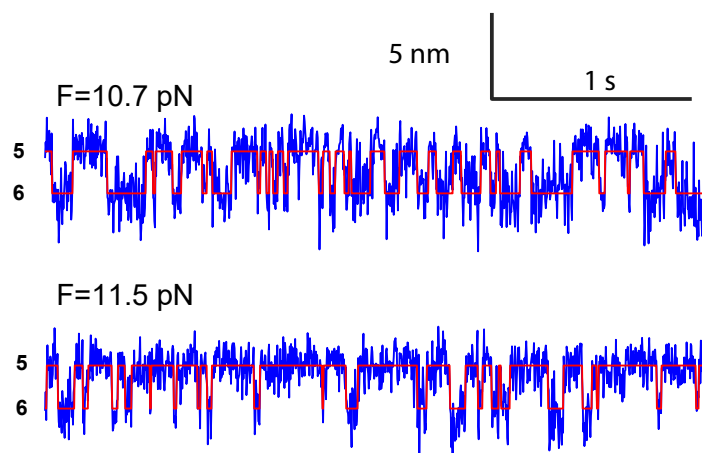

Supplement: supp [file elife_poa_e41771_Figure_2_figure_supplement_3.pdf › elife_poa_e41771_Figure_2_figure_supplement_3.pdf]

Figure 2-figure supplement 4

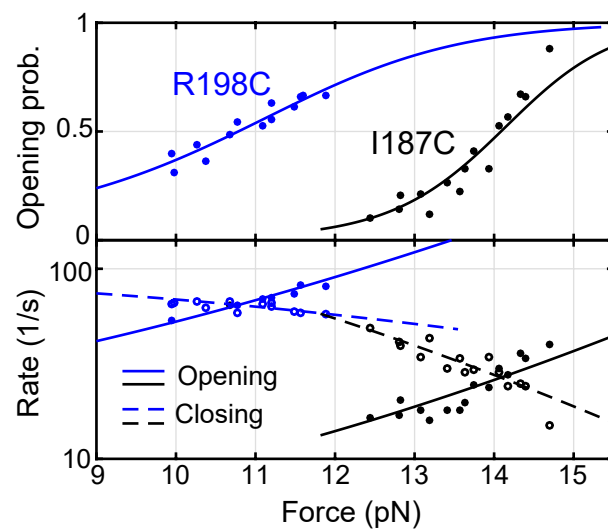

Supplement: supp [file elife_poa_e41771_Figure_2_figure_supplement_4.pdf › elife_poa_e41771_Figure_2_figure_supplement_4.pdf]

Figure 2-figure supplement 5

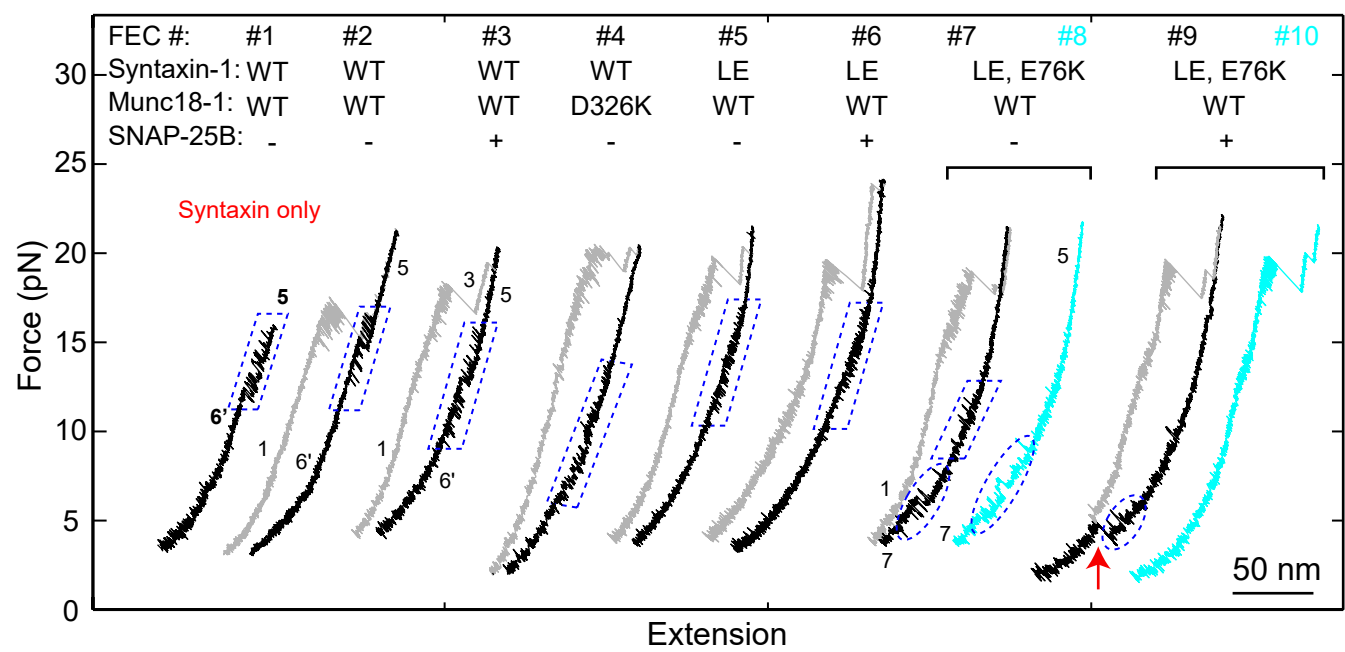

Supplement: supp [file elife_poa_e41771_Figure_2_figure_supplement_5.pdf › elife_poa_e41771_Figure_2_figure_supplement_5.pdf]

Figure 2-figure supplement 6

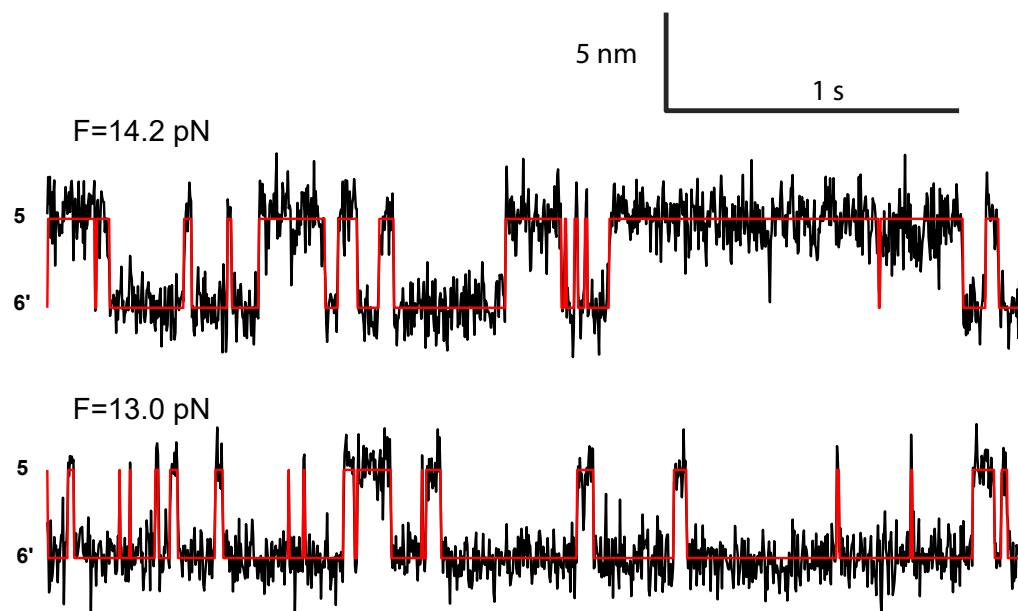

Supplement: supp [file elife_poa_e41771_Figure_2_figure_supplement_6.pdf › elife_poa_e41771_Figure_2_figure_supplement_6.pdf]

## Figure 2-figure supplement 7

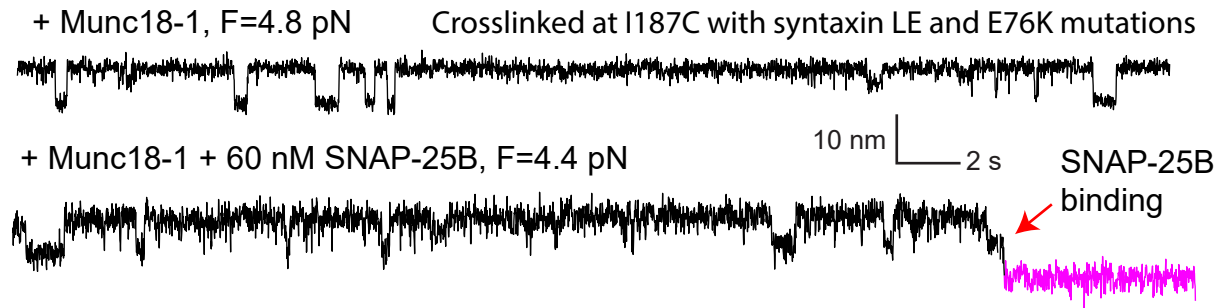

Supplement: supp [file elife_poa_e41771_Figure_2_figure_supplement_7.pdf › elife_poa_e41771_Figure_2_figure_supplement_7.pdf]

Figure 3-figure supplement 1

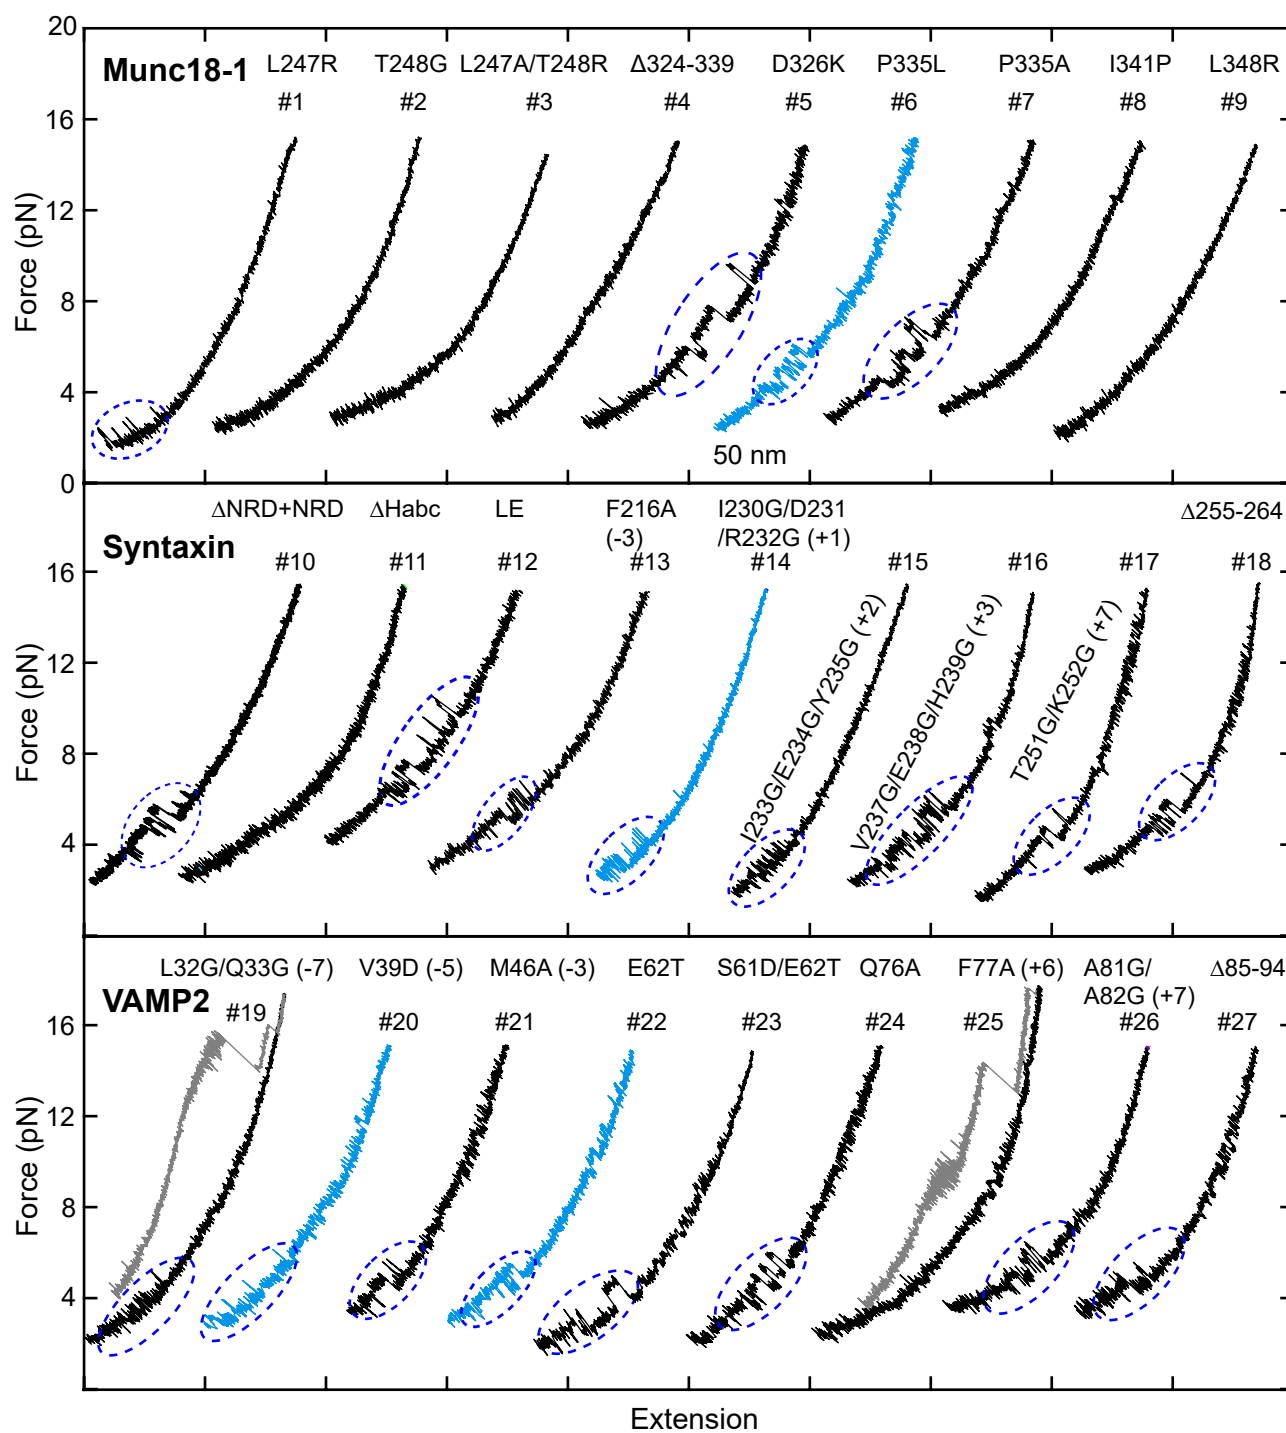

Supplement: supp [file elife_poa_e41771_Figure_3_figure_supplement_1.pdf › elife_poa_e41771_Figure_3_figure_supplement_1.pdf]

**Figure 3-figure supplement 2**

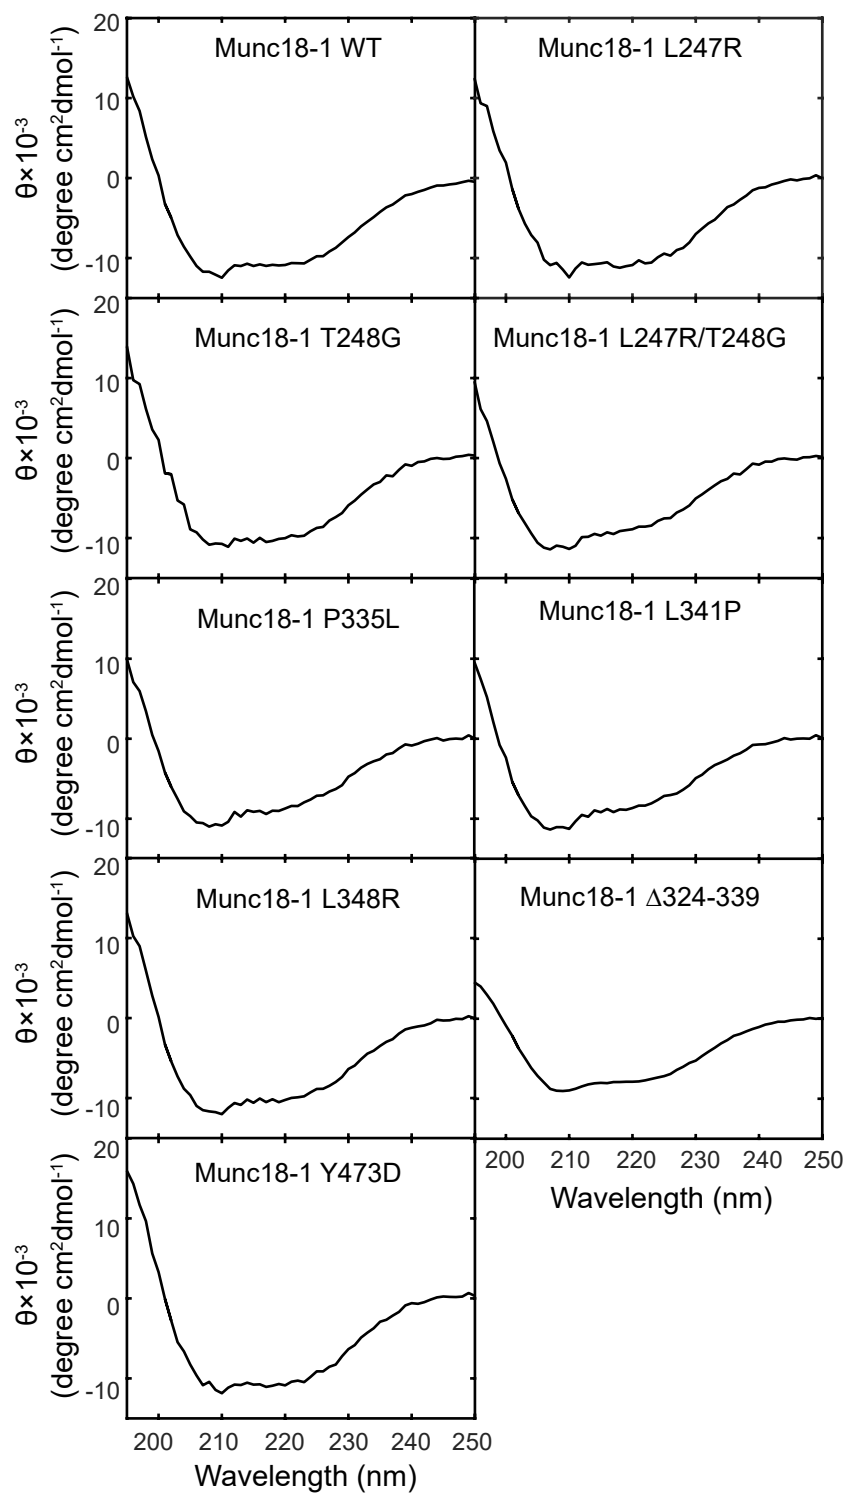

Supplement: supp [file elife_poa_e41771_Figure_3_figure_supplement_2.pdf › elife_poa_e41771_Figure_3_figure_supplement_2.pdf]

### Figure 3-figure supplement 3

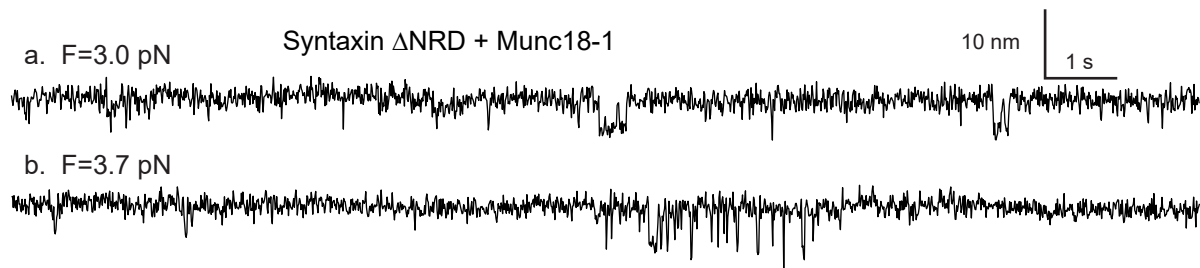

Supplement: supp [file elife_poa_e41771_Figure_3_figure_supplement_3.pdf › elife_poa_e41771_Figure_3_figure_supplement_3.pdf]

Figure 7-figure supplement 1

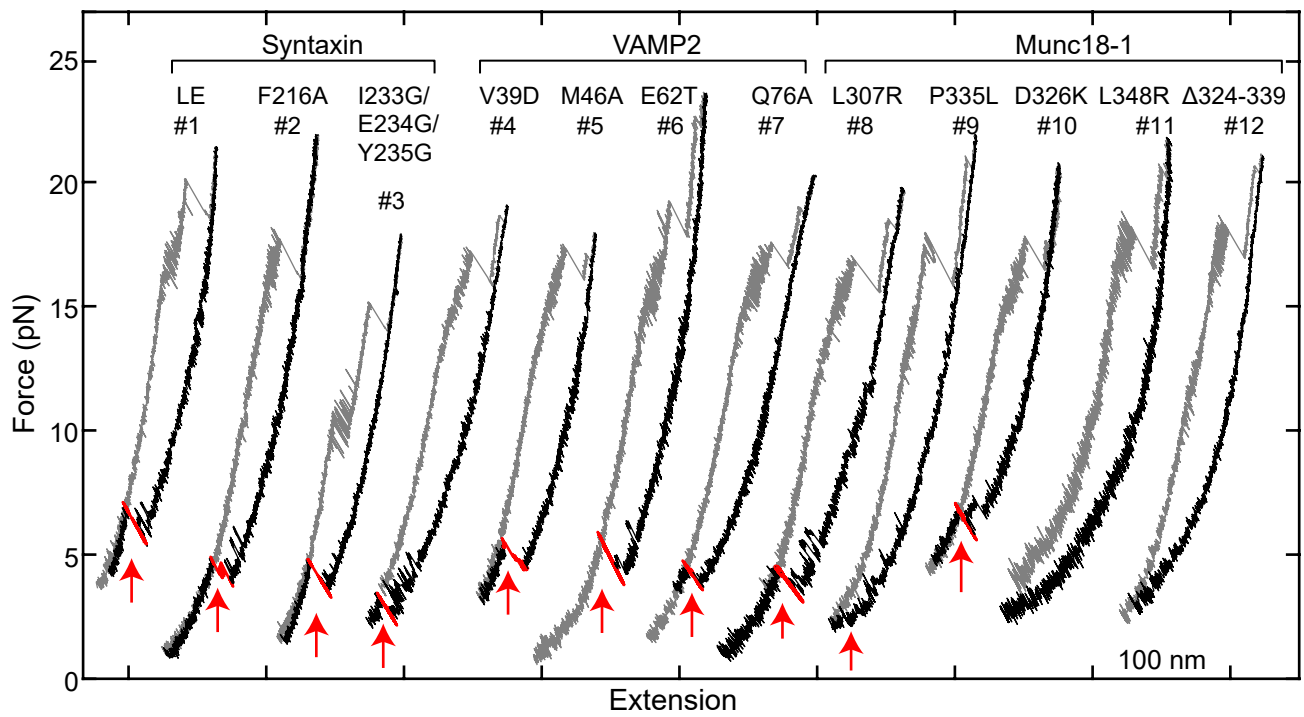

Supplement: supp [file elife_poa_e41771_Figure_7_figure_supplement_1.pdf › elife_poa_e41771_Figure_7_figure_supplement_1.pdf]

Figure 7-figure supplement 2

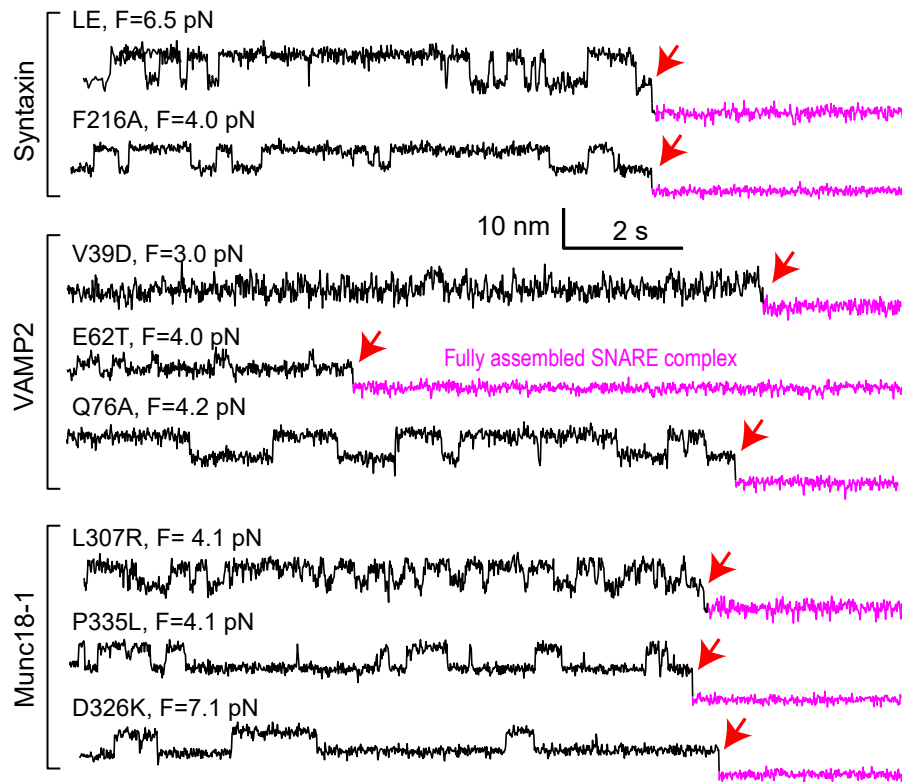

Supplement: supp [file elife_poa_e41771_Figure_7_figure_supplement_2.pdf › elife_poa_e41771_Figure_7_figure_supplement_2.pdf]
